# Supplementary material
Source: PubMed Central journal article supplement (PMC5318261)
Supplement: NIHMS823898-supplement.pdf [file NIHMS823898-supplement.pdf]

**Supplemental Table**Supplemental Table 1. Minimum AIC associated  $\delta$  and  $\tau$ .

| Outcome   | CSI-X1   |        | CSI-X2   |        |
|-----------|----------|--------|----------|--------|
|           | $\delta$ | $\tau$ | $\delta$ | $\tau$ |
| CVDH      | 0        | 1      | 0        | 1      |
| CVDA      | 0        | 2      | 0        | 3      |
| CHDH      | 0        | 1      | 0        | 1      |
| CHDA      | 0        | 2      | 0        | 10     |
| Stroke    | 0        | 1      | 0        | 1      |
| CVD Death | 0        | 1      | 0        | 1      |
| Death     | 1        | 1      | 2        | 1      |
| DVT-PE    | 9        | 2      | 9        | 5      |
